# Supplementary material
Source: publisher figshare collection journal article supplement (https://geolsoc.figshare.com/ndownloader/files/14358581)
Supplement: Supplementary file 1 [file 14358581]

## Sheet: Sheet1
Table S19 Sandstone chemistry ch. 10 Stephens Subgp. Fm. ICP-MS
Sample name	NZ13-85	N13 87	NZ13-92	N13 200	NZ13-201	N13 202	N13 204	NZ13-205	NZ13-207	N13 208	NZ13-217	NZ13-218	NZ13-219	N14 196
Rock type	sandstone	sandstone	sandstone	med. sandstone	med. sandstone	med. sandstone	coarse sandstone	fine sandstone	med. sandstone	med. sandstone	med. sandstone	calcarous sandstone	med. Sandstone	med. sandstone
Region	Mossburn quarry, Southland	Mossburn quarry, Southland	Mossburn quarry, Southland	Bare Peak, Southland	Bare Peak, Southland	Bare Peak, Southland	Bare Peak, Southland	Bare Peak, Southland	Bare Peak, Southland	Bare Peak, Southland	Bare Peak, Southland	Bare Peak, Southland	Bare Peak, Southland	Lee River
GPS	S45 65517 E168 22969	S44 85172 E168 12530	S45 65559 E168 22954	S45 39302 E168 07647	S45 39302 E168 07647	S45 39304 E168 07647	S45 39304 E168 07647	S45 39302 E168 07647	S45 38893 E168 07147	S45 38249 E168 0691	S45 37036 E168 07020	S45 37036 E168 07020	S45 37076 E168 07344	E25 22866 N54 76637
Ba	109	87	131	215	260	161	149	212	88	246	58	168	101	205
Be	4	1	1	1	1	1	4	6	3	3	3	1	3	1
Co	33.6	25.6	28	47.1	30.7	26.2	18.4	30.2	38.2	36.3	30.8	36.2	32.5	25.5
Cs	2.7	1.1	1.6	1.4	2.4	1.1	1.4	0.7	0.2	1.8	0.5	0.6	1.2	2.9
Ga	19.9	19.4	14.9	15.4	18.9	19.3	16.2	18.7	21.1	18.2	15.9	15.2	19.1	19.9
Hf	2.8	3.2	1.7	1.6	3.7	4.3	6.5	4.3	3.2	4.5	2.3	2.8	3.2	3.6
Nb	4.2	3.4	2.3	2.7	4	4.9	6.5	4.6	3.3	5.7	2.3	3	3.3	5.7
Rb	18.9	4.2	11	30.8	41.6	17	86.2	13.1	3.6	33	4.3	19.2	17.1	54.8
Sn	1	1	1	1	1	1	2	2	1	1	1	1	1	1
Sr	424.8	186.4	172.7	431.3	286.5	159.2	163.4	158	136.5	218.8	320.2	170.7	210.6	1211
Ta	2.7	1.1	0.7	2.8	1.1	1.4	1.5	1	0.9	1.7	1.1	0.4	0.7	1.7
Th	2.2	2.4	1.4	0.5	4.3	4.2	5.6	3.8	1.9	3.5	1.6	0.8	1.8	6
U	0.6	0.6	0.8	0.2	1.3	1.4	1.7	1	0.4	1	0.8	0.4	0.9	1.2
V	305	213	131	247	203	192	106	238	289	303	203	429	300	196
W	143.4	60.9	42.5	166.4	70	77	80	71.6	67.6	120.5	66.9	25.5	30.2	88.3
Zr	115.9	107.8	60.8	49.3	137.2	161.4	235.2	172.4	129.9	178.9	87	94.1	121.4	126.4
Y	25	14.2	20	17.1	22.6	25.7	29.6	29.6	20.7	28.5	23.1	17.5	16.6	23.2
La	10.5	9.9	16	4.8	11.9	14.4	20.4	14.5	10.4	15.8	10.1	7.5	9.7	14.4
Ce	24.6	24.8	31.1	12	27.8	32.6	45.1	33.2	26.3	40	27.8	16.4	21.2	30.7
Pr	3.29	3.01	3.86	1.71	3.79	4.08	6.03	4.41	3.4	4.75	3.75	2.13	2.77	3.95
Nd	15.4	12.4	18.1	8.1	16.8	18.8	27.1	20.4	16.4	20.7	18	10.3	12.3	16.9
Sm	4.06	3.1	3.73	2.54	3.76	4.59	6.68	4.87	3.75	4.99	3.94	2.73	2.84	3.64
Eu	1.25	1.03	1.17	0.84	1.13	1.23	1.63	1.41	1.19	1.46	1.22	0.73	0.88	1.07
Gd	4.55	3.26	4.34	2.96	4.17	4.65	6.13	4.94	4.01	4.89	4.54	2.88	2.94	4.17
Tb	0.75	0.52	0.6	0.53	0.66	0.78	0.97	0.81	0.64	0.81	0.67	0.47	0.5	0.7
Dy	4.71	2.86	3.6	3.23	4.29	4.67	5.83	4.76	3.85	4.88	3.99	2.89	3.23	4.41
Ho	1.01	0.59	0.73	0.69	0.78	0.97	1.19	1.08	0.76	0.98	0.92	0.56	0.63	0.9
Er	2.69	1.75	2.17	2.09	2.64	2.93	3.25	3.21	2.11	2.83	2.34	1.83	1.79	2.61
Tm	0.43	0.24	0.29	0.28	0.35	0.46	0.52	0.46	0.28	0.41	0.34	0.28	0.26	0.35
Yb	2.8	1.57	1.98	1.94	2.45	2.78	3.4	3.01	1.99	2.53	2.05	1.76	1.94	2.55
Lu	0.41	0.25	0.29	0.3	0.39	0.45	0.53	0.49	0.3	0.43	0.32	0.29	0.25	0.38
Eu/Eu*	0.889244	0.990666	0.889132	0.936691	0.872562	0.814052	0.778841	0.878964	0.938294	0.903708	0.88199	0.796022	0.931172	0.83974
Th/U	3.66667	4	1.75	2.5	3.30769	3	3.29412	3.8	4.75	3.5	2	2	2	5
